# Supplementary material for: Identification of Copy Number Variants Defining Genomic Differences among Major Human Groups
Source: PLoS One. 2009 Sep 30;4(9):e7230. doi: 10.1371/journal.pone.0007230 (PMC2747275; doi:10.1371/journal.pone.0007230)
Supplement: Table S1 — Details of regions interrogated with the MLPA probes and summary of MLPA results obtained for each probe. Conservation was only explored in regions that were confirmed to be CNVs and did not contain genes. WGTP stands for Whole Genome Tiling Path Array. (0.16 MB XLS) [file pone.0007230.s001.xls]

## Sheet: Hoja1
Table S1. Details of regions interrogated with the MLPA probes and summary of MLPA results obtained for each probe.														GEN MLPA Probe						CN state 1						CN state 2						CN state 3						CN state 4						Chi.square test				Expression data
																				CEU		CHB + JPT		YRI		CEU		CHB + JPT		YRI		CEU		CHB + JPT		YRI		CEU		CHB + JPT		YRI
CNVID	chrom	chromStart	chromEnd	Array Type	Platform	# probes	Landmark	Population	Type	Known CNV	Known SD	Genes in CNV	MLPA probe Name		Probe CNV	alternate Probe Name	CN Inferred Median	CNV	Array Agreement	#	%	#	%	#	%	#	%	#	%	#	%	#	%	#	%	#	%	#	%	#	%	#	%	p_global	CEU.YRI	CEU.CHB	CHB.YRI	Illumina Probe	gene Name
1	chr1	11633740	11633799	Agilent 44K	oligont	1	A_14_P122885	YRI	loss	None	No	FBXO2	A_14_P122885	FBXO2	Fora	A_14_P122885	(0.97)	0	0	-	-	-	-	-	-	-	-	-	-	-	-	-	-	-	-	-	-	-	-	-	-	-	-	NA	NA	NA	NA	-	-
2	chr1	25454993	25641885	WGTP	BAC	3	RP11-335G20; RP11-157K08; RP11-448K03	CEU	loss	LC0248	Yes	TMEM50A; TMEM57; RHD	chr1_25511185_25570393_A	TMEM50A	LC0248	chr1_255_A	(0.92)	0	0	-	-	-	-	-	-	-	-	-	-	-	-	-	-	-	-	-	-	-	-	-	-	-	-	NA	NA	NA	NA	GI_20357549-S	NM_014313
2	chr1	25454993	25641885	WGTP	BAC	3	RP11-335G20; RP11-157K08; RP11-448K03	CEU	loss	LC0248	Yes	TMEM50A; TMEM57; RHD	chr1_25511185_25570393_B	RHCE	LC0248	chr1_255_B	(0.47,0.92)	1	0	4	6.9	7	4.5	3	5.1	54	93.1	147	95.5	56	94.9	-	-	-	-	-	-	-	-	-	-	-	-	0.78805	0.716837	0.497231	1	GI_20336218-A	NM_138616
3	chr1	72389150	72578706	WGTP	BAC	1	RP11-763J10	ND	Complex	LC0493	No	NEGR1	chr1_72389150_72578706_A	NEGR1	LC0493	chr1_723_A	(0.79,0.87)	1	1	26	0.448276	34	0.220779	5	0.0847458	32	0.551724	120	0.779221	54	0.915254	-	-	-	-	-	-	-	-	-	-	-	-	1.74567e-05	7.33563e-06	0.00187042	0.0281481	GI_27754173-S	NM_173808
3	chr1	72389150	72578706	WGTP	BAC	1	RP11-763J10	ND	Complex	LC0493	No	NEGR1	chr1_72389150_72578706_B	None	LC0493	chr1_723_B	(0.05,2.12,3.02)	1	1	24	41.4	127	82.5	15	25.4	27	46.6	24	15.6	31	52.5	7	12.1	3	1.9	13	22	-	-	-	-	-	-	2.48944e-15	0.128913	2.19043e-08	2.96717e-15	-	-
4	chr1	143700072	143706634	Agilent 44K	oligont	3	A_14_P131082; A_14_P103187; A_14_P135298	ND	Complex	LC0752	No	PDE4DIP	Chr1_Pop_1	PDE4DIP	LC0752	Chr1_Pop_1	(1.02)	0	0	-	-	-	-	-	-	-	-	-	-	-	-	-	-	-	-	-	-	-	-	-	-	-	-	NA	NA	NA	NA	-	-
4	chr1	143700072	143706634	Agilent 44K	oligont	3	A_14_P131082; A_14_P103187; A_14_P135298	ND	Complex	LC0752	No	PDE4DIP	Chr1_Pop_2	PDE4DIP	LC0752	Chr1_Pop_2	1	0	0	-	-	-	-	-	-	-	-	-	-	-	-	-	-	-	-	-	-	-	-	-	-	-	-	NA	NA	NA	NA	-	-
5	chr1	194977713	195129718	Agilent 44K + 185K	oligont	5	A_14_P102601; A_14_P107780; A_14_P117452; A_14_P116812; A_14_P136242	ND	Complex	LC1055	Yes	CFH; CFHR3; CFHR4; CFHR1	Chr1_193470134	CFHR3	LC1055	Chr1_193470134	(0.04,0.6,1.13,1.33)	1	1	3	5.2	0	0	17	28.8	19	32.8	20	12.9	30	50.8	35	60.3	102	65.8	9	15.3	1	1.7	33	21.3	3	5.1	1.0267e-21	6.56118e-07	1.29003e-06	1.15708e-21	GI_10440561-S	NM_021023
5	chr1	194977713	195129718	Agilent 44K + 185K	oligont	5	A_14_P102601; A_14_P107780; A_14_P117452; A_14_P116812; A_14_P136242	ND	Complex	LC1055	Yes	CFH; CFHR3; CFHR4; CFHR1	Chr1B_Pop_1	CFH	LC1055	Chr1B_Pop_1	(0.87)	0	0	-	-	-	-	-	-	-	-	-	-	-	-	-	-	-	-	-	-	-	-	-	-	-	-	NA	NA	NA	NA	GI_4504374-S	NM_000186
5	chr1	194977713	195129718	Agilent 44K + 185K	oligont	5	A_14_P102601; A_14_P107780; A_14_P117452; A_14_P116812; A_14_P136242	ND	Complex	LC1055	Yes	CFH; CFHR3; CFHR4; CFHR1	Chr1B_Pop_2	CFHR1	LC1055	Chr1B_Pop_2	(0.1,0.67,1.21)	1	1	4	0.0689655	1	0.00645161	18	0.305085	18	0.310345	25	0.16129	31	0.525424	36	0.62069	129	0.832258	10	0.169492	-	-	-	-	-	-	7.92806e-20	1.33902e-06	0.000862943	5.03185e-21	GI_11321586-S	NM_002113
6	chr1	195436118	195436176	Agilent 44K	oligont	1	A_14_P105959	JPT	gain	LC1055	No	ZBTB41	A_14_P105959	ZBTB41	LC1055	A_14_P105959	(1.01,1.32)	1	1	51	89.5	137	90.7	59	100	6	10.5	14	9.3	0	0	-	-	-	-	-	-	-	-	-	-	-	-	0.0444572	0.0122298	0.794648	0.0120981	GI_34916045-S	NM_194314
7	chr1	205008616	205008675	Agilent 44K	oligont	1	A_14_P130790	CEU	gain	LC1120	No	IL10	A_14_P130790	IL10	LC1120	A_14_P130790	(1.03)	0	0	-	-	-	-	-	-	-	-	-	-	-	-	-	-	-	-	-	-	-	-	-	-	-	-	NA	NA	NA	NA	-	-
8	chr2	60989635	60989694	Agilent 44K	oligont	1	A_14_123490	CEU	gain	LC1890	No	REL	None	None	-	-	-	-	-	-	-	-	-	-	-	-	-	-	-	-	-	-	-	-	-	-	-	-	-	-	-	-	-	-	-	-	-	-	-
9	chr2	86107063	86107354	Agilent 44K	oligont	1	A_14_P111794	YRI	loss	LC2025	No	POLR1A	A_14_P110276	POLR1A	LC2025	A_14_P110276	(1.01)	0	0	-	-	-	-	-	-	-	-	-	-	-	-	-	-	-	-	-	-	-	-	-	-	-	-	NA	NA	NA	NA	-	-
9	chr2	86107063	86107354	Agilent 44K	oligont	1	A_14_P111794	YRI	loss	LC2025	No	POLR1A	A_14_P111794	POLR1A	LC2025	A_14_P111794	(0.92)	0	0	-	-	-	-	-	-	-	-	-	-	-	-	-	-	-	-	-	-	-	-	-	-	-	-	NA	NA	NA	NA	GI_7661685-S	NM_015425
10	chr2	159807486	159807545	Agilent 44K	oligont	1	A_14_P110276	CEU	gain	None	No	WDSUB1	None	None	-	-	-	-	-	-	-	-	-	-	-	-	-	-	-	-	-	-	-	-	-	-	-	-	-	-	-	-	-	-	-	-	-	-	-
11	chr2	219251485	219251544	Agilent 44K	oligont	1	A_14_P114658	YRI	loss	None	No	STK36	A_14_P114658	STK36	Fora	A_14_P114658	(0.94,1.16)	1	1	40	70.2	130	86.1	59	100	17	29.8	21	13.9	0	0	-	-	-	-	-	-	-	-	-	-	-	-	4.29133e-06	1.36617e-06	0.0145784	0.00131226	GI_34222107-S	NM_015690
12	chr2	231446469	231446516	Agilent 44K	oligont	1	A_14_P121377	JPT	loss	None	No	ITM2C	A_14_P121377	ITM2C	Fora	A_14_P121377	1	0	0	-	-	-	-	-	-	-	-	-	-	-	-	-	-	-	-	-	-	-	-	-	-	-	-	NA	NA	NA	NA	GI_19745179-S	NM_016289
13	chr2	242157688	242157737	Agilent 44K	oligont	1	A_14_P103008	JPT	gain	LC2814	No	BOK	A_14_P103008	BOK	LC2814	A_14_P103008	(1.04)	0	0	-	-	-	-	-	-	-	-	-	-	-	-	-	-	-	-	-	-	-	-	-	-	-	-	NA	NA	NA	NA	GI_34335395-S	NM_032515
14	chr3	42564861	42564920	Agilent 44K	oligont	1	A_14_P112600	CEU	gain	None	No	SEC22L3	A_14_P112600	SEC22L3	Fora	A_14_P112600	(1.02)	0	0	-	-	-	-	-	-	-	-	-	-	-	-	-	-	-	-	-	-	-	-	-	-	-	-	NA	NA	NA	NA	GI_21536310-I	NM_004206
15	chr3	46771035	46824521	Agilent 185K	oligont	3	A_16_P10818588; A_16_P10818601; A_16_P10818602	YRI	loss	LC3153	No	TSP50	Chr3_46771035	None	LC3153	Chr3_46771035	(0.07,0.61,1.18)	1	1	0	0	0	0	16	0.271186	1	0.0172414	0	0	30	0.508475	57	0.982759	155	1	13	0.220339	-	-	-	-	-	-	6.26004e-41	4.26295e-16	0.2723	3.74182e-34	-	-
16	chr3	109849657	109849716	Agilent 44K	oligont	1	A_14_P131328	YRI	gain	None	No	DZIP3	None	None	-	-	-	-	-	-	-	-	-	-	-	-	-	-	-	-	-	-	-	-	-	-	-	-	-	-	-	-	-	-	-	-	-	-	-
17	chr3	120702214	120702273	Agilent 44K	oligont	1	A_14_P125094	YRI	loss	None	No	C3orf1	A_14_P125094	C3orf1	Fora	A_14_P125094	(1.04)	0	0	-	-	-	-	-	-	-	-	-	-	-	-	-	-	-	-	-	-	-	-	-	-	-	-	NA	NA	NA	NA	GI_7706124-S	NM_016589
18	chr3	139830639	139830694	Agilent 44K	oligont	1	A_14_P107328	YRI	loss	None	No	FAIM	A_14_P107328	FAIM	Fora	A_14_P107328	1	0	0	-	-	-	-	-	-	-	-	-	-	-	-	-	-	-	-	-	-	-	-	-	-	-	-	NA	NA	NA	NA	GI_8922535-S	NM_018147
19	chr3	147989731	148192104	WGTP	BAC	1	RP11-0789C12	JPT	loss	None	No	None	chr3_147989731_148192104_A	None	Fora	chr3_147_A	(0.9)	0	0	-	-	-	-	-	-	-	-	-	-	-	-	-	-	-	-	-	-	-	-	-	-	-	-	NA	NA	NA	NA	-	-
19	chr3	147989731	148192104	WGTP	BAC	1	RP11-0789C12	JPT	loss	None	No	None	chr3_147989731_148192104_B	None	Fora	chr3_147_B	(0.93)	0	0	-	-	-	-	-	-	-	-	-	-	-	-	-	-	-	-	-	-	-	-	-	-	-	-	NA	NA	NA	NA	-	-
20	chr3	164046691	164101835	Agilent 185K	oligont	3	A_16_P11001977; A_16_P11002001; A_16_P11002038	JPT	loss	LC3802	No	None	Chr3_164046699	None	LC3802	Chr3_164046699	(0.01,0.2,1.48,2.17)	1	1	4	0.0689655	82	0.529032	0	0	4	0.0689655	33	0.212903	13	0.265306	24	0.413793	21	0.135484	21	0.428571	26	0.448276	19	0.122581	15	0.306122	1.34584e-20	0.00558861	8.94309e-14	1.6137e-13	-	-
21	chr3	187452212	187452268	Agilent 44K	oligont	1	A_14_P136595	YRI	gain	None	No	DGKG	A_14_P136595	DGKG	Fora	A_14_P136595	1	0	0	-	-	-	-	-	-	-	-	-	-	-	-	-	-	-	-	-	-	-	-	-	-	-	-	NA	NA	NA	NA	GI_4503314-S	NM_001346
22	chr3	191222891	191222950	Agilent 44K	oligont	1	A_14_P114869	JPT	loss	LC3979	No	LEPREL1	None	None	-	-	-	-	-	-	-	-	-	-	-	-	-	-	-	-	-	-	-	-	-	-	-	-	-	-	-	-	-	-	-	-	-	-	-
23	chr4	3465950	3466009	Agilent 44K	oligont	1	A_14_P119653	JPT	gain	LC4159	No	C4orf25	None	None	-	-	-	-	-	-	-	-	-	-	-	-	-	-	-	-	-	-	-	-	-	-	-	-	-	-	-	-	-	-	-	-	-	-	-
24	chr4	41441170	41441229	Agilent 44K	oligont	1	A_14_P201208	YRI	loss	None	No	PHOX2B	A_14_P201208	PHOX2B	LC4628	A_14_P201208	(1.01,1.11)	1	1	39	67.2	138	89	58	98.3	19	32.8	17	11	1	1.7	-	-	-	-	-	-	-	-	-	-	-	-	2.85124e-06	3.56842e-06	0.000364257	0.0279824	-	-
25	chr4	68980297	69150305	WGTP	BAC	1	RP11-0165D10	JPT	loss	LC4909	Yes	LOC729884; TMPRSS11E; UGT2B17	Chr4_69231671	UGT2B17	LC4909	Chr4_69231671	(0.12,1.23,2.23)	1	1	6	10.3	114	73.5	3	5.1	25	43.1	19	12.3	18	30.5	27	46.6	22	14.2	38	64.4	-	-	-	-	-	-	1.73618e-25	0.125811	5.52761e-17	2.82097e-21	GI_4507820-S	NM_001077
25	chr4	69057324	69173595	Agilent 185K	oligont	11		JPT	loss	LC4909	Yes	UGT2B17	Chr4_69231671	UGT2B17	LC4909	Chr4_69231671	(0.12,1.23,2.23)	1	1	6	10.3	114	73.5	3	5.1	25	43.1	19	12.3	18	30.5	27	46.6	22	14.2	38	64.4	-	-	-	-	-	-	1.73618e-25	0.125811	5.52761e-17	2.82097e-21	GI_4507820-S	NM_001077
25	chr4	69195907	69195966	Agilent 44K	oligont	1		JPT	loss	LC4909	Yes	UGT2B15	Chr4_69231671	UGT2B17	LC4909	Chr4_69231671	(0.12,1.23,2.23)	1	1	6	10.3	114	73.5	3	5.1	25	43.1	19	12.3	18	30.5	27	46.6	22	14.2	38	64.4	-	-	-	-	-	-	1.73618e-25	0.125811	5.52761e-17	2.82097e-21	GI_4507820-S	NM_001077
26	chr4	92154164	92154223	Agilent 44K	oligont	1	A_14_P131750	YRI	gain	None	No	None	None	None	-	-	-	-	-	-	-	-	-	-	-	-	-	-	-	-	-	-	-	-	-	-	-	-	-	-	-	-	-	-	-	-	-	-	-
27	chr4	119194270	119194329	Agilent 44K	oligont	1	A_14_P201706	YRI	loss	LC5470	No	NDST3	A_14_P201706	NDST3	LC5470	A_14_P201706	(0.98,1.3)	1	0	48	0.827586	146	0.954248	59	1	10	0.172414	7	0.0457516	0	0	0	0	0	0	0	0	-	-	-	-	-	-	0.00026004	0.000584997	0.00792436	0.194098	GI_4758765-S	NM_004784
28	chr4	170010519	170010578	Agilent 44K	oligont	1	A_14_P120771	YRI	gain	None	No	PALLD	None	None	-	-	-	-	-	-	-	-	-	-	-	-	-	-	-	-	-	-	-	-	-	-	-	-	-	-	-	-	-	-	-	-	-	-	-
29	chr5	13319637	13319696	Agilent 44K	oligont	1	A_14_P127677	CEU	loss	LC6592	No	None	None	None	-	-	-	-	-	-	-	-	-	-	-	-	-	-	-	-	-	-	-	-	-	-	-	-	-	-	-	-	-	-	-	-	-	-	-
30	chr5	32098707	32098766	Agilent 44K	oligont	1	A_14_P113338	JPT	loss	LC6769	No	PDZD2	A_14_P113338	PDZD2	LC6769	A_14_P113338	(0.95)	0	0	-	-	-	-	-	-	-	-	-	-	-	-	-	-	-	-	-	-	-	-	-	-	-	-	NA	NA	NA	NA	GI_30061506-I	NM_178140
31	chr5	70405656	70424600	Agilent 185K	oligont	2	A_16_P11428328; A_16_P11428330	YRI	gain	LC7017	Yes	OCLN; NAIP	chr5_704_A	AK130833	LC7017	chr5_704_A	(0.72,1.1)	1	1	36	0.62069	75	0.490196	2	0.0338983	22	0.37931	78	0.509804	57	0.966102	-	-	-	-	-	-	-	-	-	-	-	-	2.48555e-11	1.21905e-12	0.122161	1.16949e-11	-	-
31	chr5	70405656	70424600	Agilent 185K	oligont	2	A_16_P11428328; A_16_P11428330	YRI	gain	LC7017	Yes	OCLN; NAIP	chr5_704_B	AK130833	LC7017	chr5_704_B	(0.78,1.21)	1	1	47	81	111	72.5	4	6.8	11	19	42	27.5	55	93.2	-	-	-	-	-	-	-	-	-	-	-	-	2.38896e-20	2.42638e-17	0.219596	2.42549e-19	-	-
32	chr5	119257880	119257939	Agilent 44K	oligont	1	A_14_P126481	JPT	gain	None	No	None	A_14_P126481	None	Fora	A_14_P126481	1	0	0	-	-	-	-	-	-	-	-	-	-	-	-	-	-	-	-	-	-	-	-	-	-	-	-	NA	NA	NA	NA	-	-
33	chr5	130466896	130619811	WGTP	BAC	1	RP11-0160J23	CEU	loss	LC7530	No	HINT1; LOC90624	chr5_130466896_30619811_A	None	LC7530	chr5_130_A	(0.9)	0	0	-	-	-	-	-	-	-	-	-	-	-	-	-	-	-	-	-	-	-	-	-	-	-	-	NA	NA	NA	NA	-	-
33	chr5	130466896	130619811	WGTP	BAC	1	RP11-0160J23	CEU	loss	LC7530	No	HINT1; LOC90624	chr5_130466896_30619811_B_LYRM7	LOC90624/LYRM7	LC7530	chr5_130_B_LYRM7	(0.78,0.91)	1	0	28	48.3	19	12.3	1	1.7	30	51.7	135	87.7	58	98.3	-	-	-	-	-	-	-	-	-	-	-	-	1.02332e-11	7.45253e-10	1.23604e-07	0.0166433	GI_32171235-S	NM_181705
34	chr5	143269803	143269862	Agilent 44K	oligont	1	A_14_P116280	YRI	gain	None	No	None	A_14_P116280	None	Fora	A_14_P116280	(1.01)	0	0	-	-	-	-	-	-	-	-	-	-	-	-	-	-	-	-	-	-	-	-	-	-	-	-	NA	NA	NA	NA	-	-
35	chr5	150191404	150202900	Agilent 185K	oligont	2	A_16_P11552816; A_16_P11552828	CEU	gain	LC7667	Yes	None	chr5_150_A	None	LC7667	chr5_150_A	(0.02,0.73,1.21)	1	1	0	0	23	0.150327	18	0.305085	1	0.0172414	64	0.418301	26	0.440678	57	0.982759	66	0.431373	15	0.254237	-	-	-	-	-	-	1.83089e-15	5.40404e-18	1.36656e-14	0.0127159	-	-
35	chr5	150191404	150202900	Agilent 185K	oligont	2	A_16_P11552816; A_16_P11552828	CEU	gain	LC7667	Yes	None	chr5_150_B	None	LC7667	chr5_150_B	(0.04,0.70,1.31)	1	1	0	0	27	0.176471	18	0.305085	7	0.12069	72	0.470588	27	0.457627	51	0.87931	54	0.352941	14	0.237288	-	-	-	-	-	-	4.18945e-13	3.28953e-13	4.08732e-12	0.0825943	-	-
36	chr6	43131438	43131497	Agilent 44K	oligont	1	A_14_P127637	YRI	gain	None	No	MRPL2	None	None	-	-	-	-	-	-	-	-	-	-	-	-	-	-	-	-	-	-	-	-	-	-	-	-	-	-	-	-	-	-	-	-	-	-	-
37	chr6	160912556	160985921	WGTP	BAC	1	CTD-2310B5	JPT	gain	LC8985	Yes	LPA	Chr6_Pop_1	LPA	LC8985	Chr6_Pop_1	(1.08,1.32)	1	1	56	-	124	-	59	-	2	-	30	-	0	-	-	-	-	-	-	-	-	-	-	-	-	-	3.54094e-05	0.24359	0.00234909	3.51422e-05	GI_5031884-S	NM_005577
37	chr6	160912556	160985921	WGTP	BAC	1	CTD-2310B5	JPT	gain	LC8985	Yes	LPA	Chr6_Pop_2	LPA	LC8985	Chr6_Pop_2	(1.01)	0	0	-	-	-	-	-	-	-	-	-	-	-	-	-	-	-	-	-	-	-	-	-	-	-	-	NA	NA	NA	NA	GI_5031884-S	NM_005577
38	chr6	32594054	32633740	Agilent 185K	oligont	4	A_16_P11653717; A_16_P11653730; A_16_P11653733; A_16_P11653747	ND	Complex	LC8208	Yes	HLA-DRB5	Chr6_32594054	HLA-DRB5	LC8208	Chr6_32594054	(0.04,0.87,1.7)	1	1	2	0.0344828	32	0.206452	32	0.542373	24	0.413793	69	0.445161	21	0.355932	32	0.551724	54	0.348387	6	0.101695	-	-	-	-	-	-	1.77378e-10	1.39987e-11	0.001119	2.26379e-06	GI_26665892-S	NM_002125
39	chr7	20360347	20360406	Agilent 44K	oligont	1	A_14_P201709	YRI	gain	None	No	ITGB8	A_14_P201709	ITGB8	Fora	A_14_P201709	1	0	0	-	-	-	-	-	-	-	-	-	-	-	-	-	-	-	-	-	-	-	-	-	-	-	-	NA	NA	NA	NA	GI_4504778-S	NM_002214
40	chr7	20567604	20567663	Agilent 44K	oligont	1	A_14_P136499	JPT	loss	None	No	None	A_14_P136499	None	Fora	A_14_P136499	(0.92,1.04)	1	0	19	32.8	9	5.9	0	0	39	67.2	144	94.1	59	100	-	-	-	-	-	-	-	-	-	-	-	-	1.01396e-09	2.73635e-07	1.76971e-06	0.0649316	-	-
41	chr7	27954976	27955035	Agilent 44K	oligont	1	A_14_P133100	YRI	gain	None	No	JAZF1	A_14_P133100	JAZF1	Fora	A_14_P133100	(0.99)	0	0	-	-	-	-	-	-	-	-	-	-	-	-	-	-	-	-	-	-	-	-	-	-	-	-	NA	NA	NA	NA	GI_31341302-S	NM_175061
42	chr7	31435681	31435740	Agilent 44K	oligont	1	A_14_P124351	YRI	loss	None	No	None	A_14_P124351	None	Fora	A_14_P124351	(1.04)	0	0	-	-	-	-	-	-	-	-	-	-	-	-	-	-	-	-	-	-	-	-	-	-	-	-	NA	NA	NA	NA	-	-
43	chr7	61095653	61261586	WGTP	BAC	1	RP11-410M8	YRI	gain	LC9545	No	None	None	None	-	-	-	-	-	-	-	-	-	-	-	-	-	-	-	-	-	-	-	-	-	-	-	-	-	-	-	-	-	-	-	-	-	-	-
44	chr7	99542672	99542731	Agilent 44K	oligont	1	A_14_P200223	YRI	gain	LC9753	No	AP4M1; TAF6	A_14_P200223	AP4M1	LC9753	A_14_P200223	1	0	0	-	-	-	-	-	-	-	-	-	-	-	-	-	-	-	-	-	-	-	-	-	-	-	-	NA	NA	NA	NA	GI_14917110-S	NM_004722
45	chr7	143510480	143704657	WGTP	BAC	3	RP11-0466J06;RP11-0634O11;RP11-0714J20	YRI	loss	LC10016	Yes	FLJ43692; OR2A42; OR2A1; OR2A7; ARHGEF5	chr7_143_B	None	LC10013	chr7_143_B	(0.66,1.04,1.52)	1	0	19	0.327586	10	0.0653595	11	0.186441	39	0.672414	109	0.712418	45	0.762712	0	0	34	0.222222	3	0.0508475	-	-	-	-	-	-	4.64299e-08	0.0472118	5.67252e-09	0.000640785	-	-
45	chr7	143583309	143584405	Agilent 185K	oligont	2	A_14_P122219; A_16_P1209190	YRI	loss	LC10016	Yes	None	chr7_143_A	None	LC10016	chr7_143_A	(0.54,0.96,1.54)	1	0	19	0.327586	9	0.0588235	23	0.389831	37	0.637931	109	0.712418	32	0.542373	2	0.0344828	35	0.228758	4	0.0677966	-	-	-	-	-	-	8.96862e-10	0.490649	1.31861e-07	1.30183e-08	-	-
46	chr7	142158954	142171665	Agilent 185K	oligont	3	A_16_P12089601; A_16_P12089611; A_16_P12089619	ND	Complex	LC10013	Yes	TCRVB; PRSS2; TRY6	Chr7_141965669	None	LC10016	Chr7_141965669	(0.52,0.92,1.41,)	1	1	6	0.103448	58	0.374194	4	0.0677966	51	0.87931	90	0.580645	55	0.932203	1	0.0172414	7	0.0451613	0	0	-	-	-	-	-	-	3.46112e-07	0.422337	8.52445e-05	8.24205e-07	-	-
47	chr8	10511353	10511405	Agilent 44K	oligont	1	A_14_P139202	CEU	loss	LC10408	No	RP1L1	A_14_P139202	RP1L1	LC10408	A_14_P139202	1.00	0	0	-	-	-	-	-	-	-	-	-	-	-	-	-	-	-	-	-	-	-	-	-	-	-	-	NA	NA	NA	NA	GI_40255277-S	NM_178857
48	chr8	39356595	39499811	Agilent 185K	oligont	13	A_16_P12182779; A_16_P12182796; A_16_P12182814; A_16_P12182829; A_16_P12182836; A_16_P12182850; A_16_P12182870; A_16_P12182888; A_16_P12182903; A_16_P12182918; A_16_P12182939; A_16_P12182951; A_16_P12182969	CEU	loss	LC10533	Yes	TMDCII; TMDC	Chr8_39356595	None	LC10533	Chr8_39356595	(0.04,0.64,1.28)	1	1	14	0.241379	6	0.0387097	0	0	24	0.413793	30	0.193548	8	0.135593	20	0.344828	119	0.767742	51	0.864407	-	-	-	-	-	-	3.76807e-11	2.04964e-09	9.22344e-09	0.201709	-	-
49	chr8	57786692	57939142	WGTP	BAC	1	RP11-513O17	YRI	gain	LC10610	No	None	Chr8_Pop_1	None	LC10610	Chr8_Pop_1	(0.86)	0	0	-	-	-	-	-	-	-	-	-	-	-	-	-	-	-	-	-	-	-	-	-	-	-	-	NA	NA	NA	NA	-	-
49	chr8	57786692	57939142	WGTP	BAC	1	RP11-513O17	YRI	gain	LC10610	No	None	Chr8_Pop_2	None	Fora	Chr8_Pop_2	(0.99)	0	0	-	-	-	-	-	-	-	-	-	-	-	-	-	-	-	-	-	-	-	-	-	-	-	-	NA	NA	NA	NA	-	-
50	chr8	58157391	58314315	WGTP	BAC	2	RP11-0815G16;RP11-0430H18	YRI	gain	LC10611	No	None	chr8_58249439_58314315_A	None	LC10611	chr8_582_A	(0.91)	0	0	-	-	-	-	-	-	-	-	-	-	-	-	-	-	-	-	-	-	-	-	-	-	-	-	NA	NA	NA	NA	-	-
50	chr8	58157391	58314315	WGTP	BAC	2	RP11-0815G16;RP11-0430H18	YRI	gain	LC10611	No	None	chr8_58249439_58314315_B	None	LC10611	chr8_582_B	(0.97)	0	0	-	-	-	-	-	-	-	-	-	-	-	-	-	-	-	-	-	-	-	-	-	-	-	-	NA	NA	NA	NA	-	-
51	chr8	72630552	72630611	Agilent 44K	oligont	1	A_14_P129459	CEU	gain	None	No	None	A_14_P129459	None	Fora	A_14_P129459	1	0	0	-	-	-	-	-	-	-	-	-	-	-	-	-	-	-	-	-	-	-	-	-	-	-	-	NA	NA	NA	NA	-	-
52	chr8	108564648	108709208	WGTP	BAC	1	RP11-782A18	YRI	gain	LC10803	No	ANGPT1	chr8_108563957_108697012_A	ANGPT1	Fora	chr8_108_A	(0.92)	0	0	-	-	-	-	-	-	-	-	-	-	-	-	-	-	-	-	-	-	-	-	-	-	-	-	NA	NA	NA	NA	GI_21328452-I	NM_001146
52	chr8	108564648	108709208	WGTP	BAC	1	RP11-782A18	YRI	gain	LC10803	No	ANGPT1	chr8_108563957_108697012_B	None	Fora	chr8_108_B	(0.78,0.95)	1	0	7	0.12069	4	0.025974	0	0	51	0.87931	150	0.974026	59	1	-	-	-	-	-	-	-	-	-	-	-	-	0.00158323	0.00606262	0.0107646	0.577574	-	-
53	chr9	36353448	36353507	Agilent 44K	oligont	1	A_14_P133280	CEU	loss	None	No	RNF38	A_14_P133280	RNF38	Fora	A_14_P133280	(0.22,0.92,1.55)	1	1	21	0.368421	28	0.180645	4	0.0677966	32	0.561404	78	0.503226	27	0.457627	4	0.0701754	49	0.316129	28	0.474576	-	-	-	-	-	-	8.68102e-06	3.53886e-07	0.000345244	0.0323756	-	-
54	chr9	104230595	104390758	WGTP	BAC	1	RP11-342F21	ND	Complex	LC11580	No	None	Chr9_Pop_1	None	Fora	Chr9_Pop_1	(0.92,1.25)	1	1	58	1	153	99.4	50	84.7	0	0	1	0.6	9	15.3	-	-	-	-	-	-	-	-	-	-	-	-	6.70615e-07	0.00281085	1	4.67409e-05	-	-
54	chr9	104230595	104390758	WGTP	BAC	1	RP11-342F21	ND	Complex	LC11580	No	None	Chr9_Pop_2	BC038565	Fora	Chr9_Pop_2	(1.11)	0	0	-	-	-	-	-	-	-	-	-	-	-	-	-	-	-	-	-	-	-	-	-	-	-	-	NA	NA	NA	NA	-	-
55	chr9	133364329	133364373	Agilent 44K	oligont	1	A_14_P109840	JPT	gain	LC11807	No	KIAA0515	None	None	-	-	-	-	-	-	-	-	-	-	-	-	-	-	-	-	-	-	-	-	-	-	-	-	-	-	-	-	-	-	-	-	-	-	-
56	chr10	31647327	31647371	Agilent 44K	oligont	1	A_14_P114639	YRI	loss	None	No	None	A_14_P114639	None	Fora	A_14_P114639	1	0	0	-	-	-	-	-	-	-	-	-	-	-	-	-	-	-	-	-	-	-	-	-	-	-	-	NA	NA	NA	NA	-	-
57	chr10	45478103	45478147	Agilent 44K	oligont	1	A_14_P104547	YRI	gain	LC12274	No	ANUBL1	A_14_P104547	ANUBL1	LC12274	A_14_P104547	(1.04)	0	0	-	-	-	-	-	-	-	-	-	-	-	-	-	-	-	-	-	-	-	-	-	-	-	-	NA	NA	NA	NA	GI_28376663-S	NM_174890
58	chr10	68606250	68606309	Agilent 44K	oligont	1	A_14_P113241	YRI	gain	LC12398	No	CTNNA3	A_14_P113241	CTNNA3	LC12398	A_14_P113241	(0.95)	0	0	-	-	-	-	-	-	-	-	-	-	-	-	-	-	-	-	-	-	-	-	-	-	-	-	NA	NA	NA	NA	GI_7019570-S	NM_013266
59	chr10	85984629	85984688	Agilent 44K	oligont	1	A_14_P123353	YRI	gain	None	No	LRRC21	A_14_P123353	LRRC21	Fora	A_14_P123353	(0.97)	0	0	-	-	-	-	-	-	-	-	-	-	-	-	-	-	-	-	-	-	-	-	-	-	-	-	NA	NA	NA	NA	GI_14149693-S	NM_015613
60	chr10	98523679	98693465	WGTP	BAC	1	RP11-153G04	YRI	gain	None	Yes	LCOR	Chr10_Pop_1	None	Fora	Chr10_Pop_1	(1.02,1.4)	1	0	57	98.3	152	98.7	54	91.5	1	1.7	2	1.3	5	8.5	-	-	-	-	-	-	-	-	-	-	-	-	0.017814	0.206628	1	0.0185475	-	-
60	chr10	98523679	98693465	WGTP	BAC	1	RP11-153G04	YRI	gain	None	Yes	LCOR	Chr10_Pop_2	LCOR	Fora	Chr10_Pop_2	(1.02)	0	0	-	-	-	-	-	-	-	-	-	-	-	-	-	-	-	-	-	-	-	-	-	-	-	-	NA	NA	NA	NA	GI_39930472-S	NM_032440
61	chr11	11266887	11266946	Agilent 44K	oligont	1	A_14_P138611	YRI	loss	LC12976	No	GALNTL4	A_14_P138611	GALNTL4	LC12976	A_14_P138611	1	0	0	-	-	-	-	-	-	-	-	-	-	-	-	-	-	-	-	-	-	-	-	-	-	-	-	NA	NA	NA	NA	GI_38348337-S	NM_198516
62	chr11	28306229	28306288	Agilent 44K	oligont	1	A_14_P106601	YRI	gain	None	No	METT5D1	A_14_P106601	METT5D1	Fora	A_14_P106601	(1.01)	0	0	-	-	-	-	-	-	-	-	-	-	-	-	-	-	-	-	-	-	-	-	-	-	-	-	NA	NA	NA	NA	GI_22749298-S	NM_152636
63	chr11	66952782	66952827	Agilent 44K	oligont	1	A_14_P114204	YRI	loss	None	No	RPS6KB2	A_14_P114204	RPS6KB2	Fora	A_14_P114204	1	0	0	-	-	-	-	-	-	-	-	-	-	-	-	-	-	-	-	-	-	-	-	-	-	-	-	NA	NA	NA	NA	GI_4506738-S	NM_003952
64	chr12	11109562	11113235	Agilent 185K	oligont	2	A_16_P12993513; A_16_P12993516	JPT	gain	LC13838	Yes	PRR4; PRH1	chr12_111_A	PRR4	LC13838	chr12_111_A	(0.03,0.68,1.32)	1	1	14	24.1	9	5.9	6	10.2	33	56.9	48	31.4	31	52.5	11	19	96	62.7	22	37.3	-	-	-	-	-	-	3.38766e-08	0.0338823	6.59019e-09	0.00310566	GI_9945309-S	NM_006250
64	chr12	11109562	11113235	Agilent 185K	oligont	2	A_16_P12993513; A_16_P12993516	JPT	gain	LC13838	Yes	PRR4; PRH1	chr12_111_B	PRR4	LC13838	chr12_111_B	(0.73,1.07,1.37)	1	1	36	0.62069	9	0.0588235	50	0.819672	20	0.344828	84	0.54902	9	0.147541	2	0.0344828	60	0.392157	2	0.0327869	-	-	-	-	-	-	1.56317e-29	0.0205052	2.18803e-19	4.83166e-30	GI_9945309-S	NM_006250
65	chr12	32930628	32930687	Agilent 44K	oligont	1	A_14_P124921	CEU	loss	None	No	None	None	None	-	-	-	-	-	-	-	-	-	-	-	-	-	-	-	-	-	-	-	-	-	-	-	-	-	-	-	-	-	-	-	-	-	-	-
66	chr12	42179322	42179381	Agilent 44K	oligont	1	A_14_P126897	JPT	loss	None	No	PKP2	None	None	-	-	-	-	-	-	-	-	-	-	-	-	-	-	-	-	-	-	-	-	-	-	-	-	-	-	-	-	-	-	-	-	-	-	-
67	chr12	86904228	86904287	Agilent 44K	oligont	1	A_14_P200775	YRI	gain	None	No	ADAMTS20	A_14_P200775	C12orf50	Fora	A_14_P200775	(0.96)	0	0	-	-	-	-	-	-	-	-	-	-	-	-	-	-	-	-	-	-	-	-	-	-	-	-	NA	NA	NA	NA	GI_22749212-S	NM_152589
68	chr12	123744789	123744848	Agilent 44K	oligont	1	A_14_P106863	YRI	loss	None	No	C12orf50	A_14_P106863	None	Fora	A_14_P106863	(0.96)	0	0	-	-	-	-	-	-	-	-	-	-	-	-	-	-	-	-	-	-	-	-	-	-	-	-	NA	NA	NA	NA	-	-
69	chr13	44674177	44674236	Agilent 44K	oligont	1	A_14_P126141	YRI	gain	None	No	GTF2F2	None	None	-	-	-	-	-	-	-	-	-	-	-	-	-	-	-	-	-	-	-	-	-	-	-	-	-	-	-	-	-	-	-	-	-	-	-
70	chr13	45637710	45637768	Agilent 44K	oligont	1	A_14_P111905	CEU	gain	None	No	LCP1	A_14_P111905	LCP1	Fora	A_14_P111905	(1.03)	0	0	-	-	-	-	-	-	-	-	-	-	-	-	-	-	-	-	-	-	-	-	-	-	-	-	NA	NA	NA	NA	GI_7382490-S	NM_002298
71	chr13	56562261	56689097	WGTP	BAC	1	RP11-279F15	YRI	gain	LC14892	Yes	FLJ40296	Chr13_Pop_1	FLJ40296	LC14892	Chr13_Pop_1	(0.81,1.19)	1	1	43	74.1	140	90.9	23	39	15	25.9	14	9.1	36	61	-	-	-	-	-	-	-	-	-	-	-	-	7.51309e-14	0.000173683	0.0029784	2.44506e-14	GI_38348197-S	NM_198441
71	chr13	56562261	56689097	WGTP	BAC	1	RP11-279F15	YRI	gain	LC14892	Yes	FLJ40296	Chr13_Pop_2	None	LC14892	Chr13_Pop_2	(0.02,0.95,01.75)	1	0	2	3.4	31	20	30	50.8	25	43.1	94	60.6	22	37.3	31	53.4	30	19.4	7	11.9	-	-	-	-	-	-	2.47077e-12	2.38398e-10	1.49883e-06	8.61585e-05	-	-
72	chr13	74998093	74998152	Agilent 44K	oligont	1	A_14_P128372	CEU	gain	None	No	COMMD6	A_14_P128372	COMMD6	Fora	A_14_P128372	(1.02)	0	0	-	-	-	-	-	-	-	-	-	-	-	-	-	-	-	-	-	-	-	-	-	-	-	-	NA	NA	NA	NA	GI_45333908-I	NM_203497
73	chr13	86239183	86239242	Agilent 44K	oligont	1	A_14_P114194	YRI	gain	None	No	None	A_14_P114194	None	Fora	A_14_P114194	1	0	0	-	-	-	-	-	-	-	-	-	-	-	-	-	-	-	-	-	-	-	-	-	-	-	-	NA	NA	NA	NA	-	-
74	chr14	75067722	75067781	Agilent 44K	oligont	1	A_14_P134451	CEU	loss	None	No	None	A_14_P134451	BATF	Fora	A_14_P134451	(1.01)	0	0	-	-	-	-	-	-	-	-	-	-	-	-	-	-	-	-	-	-	-	-	-	-	-	-	NA	NA	NA	NA	GI_18375640-S	NM_006399
75	chr14	105991294	106085250	WGTP	BAC	1	RP11-379F22	YRI	gain	LC16055	Yes	None	Chr14_Pop_1	None	LC16055	Chr14_Pop_1	(0.7,1.18)	1	0	19	32.8	39	25.2	21	35.6	39	67.2	116	74.8	38	64.4	-	-	-	-	-	-	-	-	-	-	-	-	0.252821	0.845966	0.30077	0.1725	-	-
76	chr14	105467525	106005747	Agilent 44K	oligont	2	chr14:105467525-106005747	YRI	gain	LC16055	Yes	BATF	Chr14_Pop_2	None	LC16055	Chr14_Pop_2	(0.89,1.14)	1	1	48	82.8	142	91.6	25	42.4	10	17.2	13	8.4	34	57.6	-	-	-	-	-	-	-	-	-	-	-	-	1.92303e-14	8.29594e-06	0.0818572	1.66436e-13	-	-
77	chr15	19970467	20097557	WGTP	BAC	1	RP11-603B24	YRI	gain	LC16090	Yes	None	Chr15_Pop_1	None	LC16090	Chr15_Pop_1	(0.88,1.27)	1	0	58	100	146	94.8	53	89.8	0	0	8	5.2	6	10.2	-	-	-	-	-	-	-	-	-	-	-	-	0.0280138	0.0273478	0.110486	0.219165	-	-
77	chr15	19970467	20097557	WGTP	BAC	1	RP11-603B24	YRI	gain	LC16090	Yes	None	Chr15_Pop_2	None	LC16090	Chr15_Pop_2	(0.95)	0	0	-	-	-	-	-	-	-	-	-	-	-	-	-	-	-	-	-	-	-	-	-	-	-	-	NA	NA	NA	NA	-	-
78	chr16	14956177	14988913	Agilent 185K	oligont	5	A_16_P13678497; A_14_P127743; A_16_P13678506; A_16_P13678507; A_14_P112130	JPT	loss	LC16730	Yes	KIAA0251	A_14_P127743	None	LC16730	A_14_P127743	(0.57,1.01,1.48)	1	1	1	0.0172414	58	0.379085	1	0.0169492	40	0.689655	91	0.594771	57	0.966102	17	0.293103	4	0.0261438	1	0.0169492	-	-	-	-	-	-	3.21397e-18	3.1464e-05	7.89311e-13	4.44991e-09	-	-
78	chr16	14956177	14988913	Agilent 185K	oligont	5	A_16_P13678497; A_14_P127743; A_16_P13678506; A_16_P13678507; A_14_P112130	JPT	loss	LC16730	Yes	KIAA0251	Chr16_Pop_1	KIAA0251	LC16730	Chr16_Pop_1	(0.71,0.93)	1	1	8	0.137931	66	0.428571	2	0.0338983	50	0.862069	88	0.571429	57	0.966102	0	0	0	0	0	0	-	-	-	-	-	-	1.72643e-09	0.053273	4.73848e-05	1.99481e-09	GI_39930344-S	NM_015027
78	chr16	14956177	14988913	Agilent 185K	oligont	5	A_16_P13678497; A_14_P127743; A_16_P13678506; A_16_P13678507; A_14_P112130	JPT	loss	LC16730	Yes	KIAA0251	Chr16_Pop_2	None	LC16730	Chr16_Pop_2	(0.66,1.07)	1	1	0	0	62	40	0	0	58	100	93	60	59	100	-	-	-	-	-	-	-	-	-	-	-	-	6.87313e-14	1	4.04162e-11	3.51734e-11	-	-
79	chr16	21858880	21858939	Agilent 44K	oligont	1	A_14_P125316	CEU	gain	LC16761	No	None	A_14_P125316	None	LC16761	A_14_P125316	(0.94)	0	0	-	-	-	-	-	-	-	-	-	-	-	-	-	-	-	-	-	-	-	-	-	-	-	-	NA	NA	NA	NA	-	-
80	chr16	32481309	32530049	Agilent 185K	oligont	5	A_16_P13701011; A_16_P13701013; A_16_P13701014; A_16_P13701027; A_16_P13701043	YRI	gain	LC16821	Yes	None	Chr16_32481309	None	LC16821	Chr16_32481309	(0.65,0.99,1.32)	1	0	12	0.206897	44	0.283871	3	0.0508475	39	0.672414	69	0.445161	27	0.457627	7	0.12069	42	0.270968	29	0.491525	-	-	-	-	-	-	5.65914e-06	1.54574e-05	0.00951399	7.88962e-05	-	-
81	chr16	54359983	54376864	Agilent 185K	oligont	3	A_16_P13716849; A_16_P13716851; A_16_P13716865	YRI	gain	LC16875	Yes	CES4	chr16_543_A	None	LC16875	chr16_543_A	(0.04,0.60,1.23)	1	1	2	3.4	18	11.8	0	0	19	32.8	73	47.7	1	1.7	37	63.8	62	40.5	58	98.3	-	-	-	-	-	-	2.15741e-12	7.97998e-07	0.00717393	4.00319e-16	-	-
81	chr16	54359983	54376864	Agilent 185K	oligont	3	A_16_P13716849; A_16_P13716851; A_16_P13716865	YRI	gain	LC16875	Yes	CES4	chr16_543_B	None	LC16875	chr16_543_B	(0.05,0.67,1.25)	1	1	2	0.0344828	19	0.124183	0	0	23	0.396552	75	0.490196	2	0.0338983	33	0.568966	59	0.385621	57	0.966102	-	-	-	-	-	-	2.46686e-12	2.04089e-07	0.0250575	1.26911e-15	-	-
82	chr16	68751390	68751443	Agilent 44K	oligont	1	A_14_P102312	JPT	loss	LC16959	No	PDPR	None	None	-	-	-	-	-	-	-	-	-	-	-	-	-	-	-	-	-	-	-	-	-	-	-	-	-	-	-	-	-	-	-	-	-	-	-
83	chr16	70653608	70669840	Agilent 185K	oligont	3	A_16_P13743312;	YRI	gain	LC16970	Yes	HPR	Chr16_70653608	HPR	LC16970	Chr16_70653608	(0.87,0.96,1.83)	1	1	5	8.6	4	2.6	1	1.7	53	91.4	151	97.4	38	64.4	0	0	0	0	20	33.9	-	-	-	-	-	-	5.19569e-17	1.38167e-07	0.0641983	4.28644e-13	GI_45580722-S	NM_020995
84	chr17	18140806	18395498	WGTP	BAC	2	RP11-34O10; RP11-484D23	CEU	loss	LC17377	Yes	TOP3A; SHMT1; SMCR8; LOC654346	chr17_18215871_18318880_A	None	LC17377	chr17_182_A	(0.92)	0	0	-	-	-	-	-	-	-	-	-	-	-	-	-	-	-	-	-	-	-	-	-	-	-	-	NA	NA	NA	NA	-	-
84	chr17	18140806	18395498	WGTP	BAC	2	RP11-34O10; RP11-484D23	CEU	loss	LC17377	Yes	TOP3A; SHMT1; SMCR8; LOC654346	chr17_18215871_18318880_BC040601	BC040601	LC17388	chr17_182_BC040601	(0.97)	0	0	-	-	-	-	-	-	-	-	-	-	-	-	-	-	-	-	-	-	-	-	-	-	-	-	NA	NA	NA	NA	-	-
85	chr17	31309398	31466733	WGTP	BAC	2	RP11-104J23; RP11-355O04	CEU	loss	LC17457	Yes	CCL16; CCL14; CCL15; CCL23; CCL18; CCL3; CCL4	chr17_31410352_31466733_A_CCL18	CCL18	LC17457	chr17_314_A_CCL18	(0.96)	0	0	-	-	-	-	-	-	-	-	-	-	-	-	-	-	-	-	-	-	-	-	-	-	-	-	NA	NA	NA	NA	GI_22547150-S	NM_002988
85	chr17	31309398	31466733	WGTP	BAC	2	RP11-104J23; RP11-355O04	CEU	loss	LC17457	Yes	CCL16; CCL14; CCL15; CCL23; CCL18; CCL3; CCL4	chr17_31410352_31466733_B_CCL3	CCL3	LC17457	chr17_314_B_CCL3	1	0	0	-	-	-	-	-	-	-	-	-	-	-	-	-	-	-	-	-	-	-	-	-	-	-	-	NA	NA	NA	NA	GI_4506842-S	NM_002983
86	chr17	31801769	32075536	WGTP	BAC	2	RP11-1330O06; CTD-2196A18	CEU	loss	LC17457	Yes	ZNF403; TBC1D3C; TBC1D3G; ZNHIT3; MYOHD1; PIGW; MGC4172; MRM1	chr17_31826819_33422559_A_MYOHD1	MYOHD1	LC17457	chr17_318_A_MYOHD1	(0.95)	0	0	-	-	-	-	-	-	-	-	-	-	-	-	-	-	-	-	-	-	-	-	-	-	-	-	NA	NA	NA	NA	GI_34147511-S	NM_025109
86	chr17	31801769	32075536	WGTP	BAC	2	RP11-1330O06; CTD-2196A18	CEU	loss	LC17457	Yes	ZNF403; TBC1D3C; TBC1D3G; ZNHIT3; MYOHD1; PIGW; MGC4172; MRM1	chr17_31826819_33422559_B_DDX52	DDX52	LC17457	chr17_318_B_DDX52	(1.02)	0	0	-	-	-	-	-	-	-	-	-	-	-	-	-	-	-	-	-	-	-	-	-	-	-	-	NA	NA	NA	NA	GI_38569504-A	NM_007010
87	chr17	33267468	33427467	WGTP	BAC	5	CTD-2344A06; RP11-722D15; RP11-600K04; RP11-121G16; RP11-342F22; RP11-678G07	CEU	loss	LC17457	Yes	TBC1D3	chr17_33369043_33387765_A	None	LC17457	chr17_333_A	(0.86,1.17)	1	1	52	0.912281	55	0.364238	5	0.0847458	5	0.0877193	96	0.635762	54	0.915254	-	-	-	-	-	-	-	-	-	-	-	-	2.2412e-19	6.47466e-21	2.00697e-13	3.18724e-05	-	-
87	chr17	33267468	33427467	WGTP	BAC	5	CTD-2344A06; RP11-722D15; RP11-600K04; RP11-121G16; RP11-342F22; RP11-678G07	CEU	loss	LC17457	Yes	TBC1D3	chr17_33369043_33387765_B	None	LC17457	chr17_333_B	(1.05)	0	0	-	-	-	-	-	-	-	-	-	-	-	-	-	-	-	-	-	-	-	-	-	-	-	-	NA	NA	NA	NA	-	-
88	chr17	33535461	33705009	WGTP	BAC	2	RP11-72I20	CEU	loss	LC17457	Yes	TBC1D3	chr17_33585687_33697018_A	TBC1D3	LC17457	chr17_335_A	(0.87,1.23)	1	1	40	0.714286	48	0.317881	0	0	16	0.285714	103	0.682119	59	1	-	-	-	-	-	-	-	-	-	-	-	-	3.66855e-15	2.88218e-18	5.25075e-07	1.89411e-08	GI_14149984-S	NM_032258
88	chr17	33535461	33705009	WGTP	BAC	2	RP11-72I20	CEU	loss	LC17457	Yes	TBC1D3	chr17_33585687_33697018_B	None	LC17457																																	-	-
89	chr17	41519537	41734024	WGTP	BAC	3	RP11-86C01;RP11-259G18;RP11-162O14	CEU	gain	LC17522	Yes	KIAA1267; LRRC37A; ARL17	chr17_415_A	KIAA1267	LC17522	chr17_415_A	(0.89,1)	1	1	25	43.1	140	91.5	49	83.1	33	56.9	13	8.5	10	16.9	-	-	-	-	-	-	-	-	-	-	-	-	6.96337e-14	8.29594e-06	5.98461e-13	0.0874098	GI_41152088-S	NM_015443
89	chr17	41519537	41734024	WGTP	BAC	3	RP11-86C01;RP11-259G18;RP11-162O14	CEU	gain	LC17522	Yes	KIAA1267; LRRC37A; ARL17	chr17_415_B	None	LC17522	chr17_415_B	(0.72,0.99)	1	1	19	32.8	144	94.1	56	94.9	39	67.2	9	5.9	3	5.1	-	-	-	-	-	-	-	-	-	-	-	-	9.72317e-22	2.97872e-13	1.08335e-19	1	-	-
89	chr17	41624471	41624530	Agilent 44K	oligont	1	A_14_P139169	CEU	gain	LC17522	Yes	None	None	None	-	-	-	-	-	-	-	-	-	-	-	-	-	-	-	-	-	-	-	-	-	-	-	-	-	-	-	-	-	-	-	-	-	-	-
90	chr17	41949832	42244748	WGTP	BAC	2	CTD-2013G18;RP11-84A07	JPT	gain	LC17522	Yes	NSF; WNT3; LOC474170; ARL17	chr17_42061812_42110026_A	NSF	LC17522	chr17_420_A	(0.56,0.95,1.44)	1	0	15	0.258621	30	0.193548	18	0.305085	37	0.637931	96	0.619355	41	0.694915	6	0.103448	29	0.187097	0	0	-	-	-	-	-	-	0.00491533	0.0455897	0.266141	0.00011014	GI_11079227-S	NM_006178
90	chr17	41949832	42244748	WGTP	BAC	2	CTD-2013G18;RP11-84A07	JPT	gain	LC17522	Yes	NSF; WNT3; LOC474170; ARL17	chr17_42061812_42110026_B	NSF	LC17522	chr17_420_B	(0.57,0.98,1.53)	1	0	13	0.224138	24	0.154839	16	0.271186	36	0.62069	96	0.619355	43	0.728814	9	0.155172	35	0.225806	0	0	-	-	-	-	-	-	0.00145246	0.00501003	0.35611	1.04914e-05	GI_11079227-S	NM_006178
91	chr17	42866562	43120185	WGTP	BAC	2	RP11-771D19;RP11-104O05	YRI	gain	LC17530	Yes	NPEPPS; C17orf57; KPNB1	chr17_429_A´	NPEPPS	LC17530	chr17_429_A2	(0.86,1.16)	1	1	47	81	96	62.7	2	3.4	11	19	57	37.3	57	96.6	-	-	-	-	-	-	-	-	-	-	-	-	1.19993e-18	1.55405e-19	0.0130512	5.79033e-17	GI_15451906-S	NM_006310
91	chr17	42866562	43120185	WGTP	BAC	2	RP11-771D19;RP11-104O05	YRI	gain	LC17530	Yes	NPEPPS; C17orf57; KPNB1	chr17_42973027_43038163_A	NPEPPS	LC17530	chr17_429_B2	(0.68,1.21)	1	1	51	87.9	52	34	0	0	7	12.1	101	66	59	100	-	-	-	-	-	-	-	-	-	-	-	-	4.22369e-22	6.39487e-26	5.47554e-13	2.41455e-09	GI_15451906-S	NM_006310
91	chr17	42975162	43019604	Agilent 185K	oligont	2	A_16_P13850603; A_16_P13850604	YRI	gain	LC17530	Yes	NPEPPS	chr17_429_B´	NPEPPS	LC17530	chr17_429_B	(0.99)	0	0	-	-	-	-	-	-	-	-	-	-	-	-	-	-	-	-	-	-	-	-	-	-	-	-	NA	NA	NA	NA	GI_15451906-S	NM_006310
91	chr17	42975162	43019604	Agilent 185K	oligont	2	A_16_P13850603; A_16_P13850604	YRI	gain	LC17530	Yes	NPEPPS	chr17_42973027_43038163_B	NPEPPS	LC17530	chr17_42973027_43038163_A	(1.07,1.95)	1	0	25	43.1	142	92.8	59	100	33	56.9	11	7.2	0	0	-	-	-	-	-	-	-	-	-	-	-	-	4.85065e-18	1.2651e-13	6.17148e-14	0.0368791	GI_15451906-S	NM_006310
92	chr17	48882141	48882200	Agilent 44K	oligont	1	A_14_P118600	YRI	gain	None	No	None	A_14_P118600	None	Fora	A_14_P118600	(1.01)	0	0	-	-	-	-	-	-	-	-	-	-	-	-	-	-	-	-	-	-	-	-	-	-	-	-	NA	NA	NA	NA	-	-
93	chr17	57529441	57842003	WGTP	BAC	2	RP11-633K03;RP11-51L05	YRI	gain	LC17608	Yes	EFCAB3	chr17_57650339_57724323_A	None	LC17608	chr17_576_A	(0.94)	0	0	-	-	-	-	-	-	-	-	-	-	-	-	-	-	-	-	-	-	-	-	-	-	-	-	NA	NA	NA	NA	-	-
93	chr17	57529441	57842003	WGTP	BAC	2	RP11-633K03;RP11-51L05	YRI	gain	LC17608	Yes	EFCAB3	chr17_57650339_57724323_B	None	LC17608	chr17_576_B	(1.68,2.58,3.63)	1	0	3	0.0517241	49	0.318182	52	0.881356	34	0.586207	91	0.590909	7	0.118644	21	0.362069	14	0.0909091	0	0	-	-	-	-	-	-	4.03198e-23	2.39123e-22	1.00253e-07	1.21315e-13	-	-
94	chr18	17945381	17945440	Agilent 44K	oligont	1	A_14_P109859	YRI	loss	None	No	None	A_14_P109859	None	Fora	A_14_P109859	(0.98)	0	0	-	-	-	-	-	-	-	-	-	-	-	-	-	-	-	-	-	-	-	-	-	-	-	-	NA	NA	NA	NA	-	-
95	chr18	66458884	66458943	Agilent 44K	oligont	1	A_14_P105333	YRI	gain	LC18463	No	None	A_14_P105333	None	LC18463	A_14_P105333	(1.04)	0	0	-	-	-	-	-	-	-	-	-	-	-	-	-	-	-	-	-	-	-	-	-	-	-	-	NA	NA	NA	NA	-	-
96	chr19	8743028	8784826	WGTP	BAC	2	RP11-680A23;RP11-14H08	YRI	gain	LC18794	Yes	ZNF558	chr19_8743145_8784792_A	ZNF558	LC18794	chr19_874_A	(0.98)	0	0	-	-	-	-	-	-	-	-	-	-	-	-	-	-	-	-	-	-	-	-	-	-	-	-	NA	NA	NA	NA	GI_21687263-S	NM_144693
96	chr19	8743028	8784826	WGTP	BAC	2	RP11-680A23;RP11-14H08	YRI	gain	LC18794	Yes	ZNF558	chr19_8743145_8784792_B	None	LC18794	chr19_8743145_8784792_B	(0.8,1.28)	1	0	38	65.5	112	73.2	55	93.2	20	34.5	41	26.8	4	6.8	-	-	-	-	-	-	-	-	-	-	-	-	0.000393951	0.000205261	0.308506	0.00120113	-	-
97	chr19	10807099	10807144	Agilent 44K	oligont	1	A_14_P100095	JPT	loss	LC18821	No	TMED1	A_14_P100095	TMED1	LC18821	A_14_P100095	(0.96)	0	0	-	-	-	-	-	-	-	-	-	-	-	-	-	-	-	-	-	-	-	-	-	-	-	-	0.229657	0.255372	0.877195	0.0906053	GI_27894322-S	NM_006858
98	chr19	11298922	11298976	Agilent 44K	oligont	1	A_14_P112851	CEU	gain	None	No	RAB3D	A_14_P112851	RAB3D	Fora	A_14_P112851	(1.05,1.46)	1	1	49	84.5	152	98.1	58	100	9	15.5	3	1.9	0	0	-	-	-	-	-	-	-	-	-	-	-	-	0.000107688	0.00279366	0.000537756	0.564083	GI_18677727-S	NM_004283
99	chr19	15703821	15703878	Agilent 44K	oligont	1	A_14_P101716	JPT	gain	LC18857	No	None	None	None	-	-	-	-	-	-	-	-	-	-	-	-	-	-	-	-	-	-	-	-	-	-	-	-	-	-	-	-	-	-	-	-	-	-	-
100	chr19	35146604	35146663	Agilent 44K	oligont	1	A_14_P105094	CEU	gain	None	No	C19orf2	A_14_P105094	C19orf2	Fora	A_14_P105094	1	0	0	-	-	-	-	-	-	-	-	-	-	-	-	-	-	-	-	-	-	-	-	-	-	-	-	NA	NA	NA	NA	GI_19924160-A	NM_134447
101	chr19	45815416	45815473	Agilent 44K	oligont	1	A_14_P123445	YRI	gain	None	No	PIP5K1C	A_14_P123445	LTBP4	Fora	A_14_P123445	(1.07)	0	0	-	-	-	-	-	-	-	-	-	-	-	-	-	-	-	-	-	-	-	-	-	-	-	-	NA	NA	NA	NA	GI_4505036-S	NM_003573
102	chr19	3612656	3612712	Agilent 44K	oligont	1	A_14_P101883	ND	Complex	None	No	LTBP4	None	None	-	-	-	-	-	-	-	-	-	-	-	-	-	-	-	-	-	-	-	-	-	-	-	-	-	-	-	-	-	-	-	-	-	-	-
103	chr20	30111396	30111455	Agilent 44K	oligont	1	A_14_P105195	JPT	gain	LC19551	No	HCK	A_14_P105195	HCK	LC19551	A_14_P105195	(1.01,1.26)	1	1	58	100	139	89.7	59	100	0	0	16	10.3	0	0	-	-	-	-	-	-	-	-	-	-	-	-	0.000676015	1	0.00721326	0.00711254	GI_30795228-S	NM_002110
104	chr20	45976880	45997244	WGTP	BAC	1	RP11-739A15	YRI	gain	LC19754	Yes	None	chr20_45976880_45997244_A	None	LC19754	chr20_459_A	(0.87)	0	0	-	-	-	-	-	-	-	-	-	-	-	-	-	-	-	-	-	-	-	-	-	-	-	-	NA	NA	NA	NA	-	-
104	chr20	45976880	45997244	WGTP	BAC	1	RP11-739A15	YRI	gain	LC19754	Yes	None	chr20_45976880_45997244_B	None	LC19754	chr20_459_B	(0.85,0.96)	1	0	38	65.5	27	17.5	6	10.2	20	34.5	127	82.5	53	89.8	-	-	-	-	-	-	-	-	-	-	-	-	8.48484e-14	3.04123e-10	6.54455e-11	0.210553	-	-
105	chr21	20801914	20976458	WGTP	BAC	1	RP11-580L02	JPT	loss	LC20086	No	None	chr21_20801914_20976458_A	None	LC20086	chr21_208_A	(0.97)	0	0	-	-	-	-	-	-	-	-	-	-	-	-	-	-	-	-	-	-	-	-	-	-	-	-	NA	NA	NA	NA	-	-
105	chr21	20801914	20976458	WGTP	BAC	1	RP11-580L02	JPT	loss	LC20086	No	None	chr21_20801914_20976458_B	None	LC20086	chr21_208_B	(1.02)	0	0	-	-	-	-	-	-	-	-	-	-	-	-	-	-	-	-	-	-	-	-	-	-	-	-	NA	NA	NA	NA	-	-
106	chr21	37119939	37119998	Agilent 44K	oligont	1	A_14_P115416	YRI	loss	LC20214	No	HLCS	A_14_P115416	HLCS	LC20214	A_14_P115416	1	0	0	-	-	-	-	-	-	-	-	-	-	-	-	-	-	-	-	-	-	-	-	-	-	-	-	NA	NA	NA	NA	GI_19923101-S	NM_000411
107	chr22	19697944	19698002	Agilent 44K	oligont	1	A_14_P125992	CEU	gain	LC20342	Yes	MGC16703	None	None	-	-	-	-	-	-	-	-	-	-	-	-	-	-	-	-	-	-	-	-	-	-	-	-	-	-	-	-	-	-	-	-	-	-	-
108	chr22	19839192	20024381	WGTP	BAC	4	RP11-892O08;RP11-818K20;RP11-444L07;RP11-690P21	JPT	loss	LC20342	Yes	GGT2	chr22_19944583_19998605_A	None	LC20342	chr22_199_B_DKFZ	(0.92)	0	0	-	-	-	-	-	-	-	-	-	-	-	-	-	-	-	-	-	-	-	-	-	-	-	-	NA	NA	NA	NA	-	-
109	chr22	30015137	30015186	Agilent 44K	oligont	1	A_14_P130942	YRI	loss	None	No	MGC17330	None	None	-	-	-	-	-	-	-	-	-	-	-	-	-	-	-	-	-	-	-	-	-	-	-	-	-	-	-	-	-	-	-	-	-	-	-
110	chr22	37689058	37715431	Agilent 44K	oligont	3	A_14_P138833; A_14_P116091; A_16_P120313	ND	Complex	LC20507	Yes	APOBEC3A; APOBEC3B	Chr22_Pop_1	None	LC20507	Chr22_Pop_1	(0.13,0.7,1.2)	1	1	0	0	16	10.4	0	0	8	13.8	59	38.3	6	10.2	50	86.2	79	51.3	53	89.8	-	-	-	-	-	-	1.11291e-08	0.581757	3.50893e-06	2.53397e-07	-	-
110	chr22	37689058	37715431	Agilent 44K	oligont	3	A_14_P138833; A_14_P116091; A_16_P120313	ND	Complex	LC20507	Yes	APOBEC3A; APOBEC3B	Chr22_Pop_2	APOBEC3B	LC20507	Chr22_Pop_2	(0.01,0.57,1.1)	1	1	0	0	16	10.3	0	0	8	13.8	62	40	4	6.8	50	86.2	77	49.7	55	93.2	-	-	-	-	-	-	2.84254e-10	0.23892	1.65249e-06	2.04685e-09	GI_22907024-S	NM_004900
111	chr22	22696038	22725353	Agilent 185K	oligont	5	A_16_P14308922; A_16_P14308932; A_14_P111340; A_16_P14308965; A_16_P14308968	ND	Complex	LC20386	Yes	GSTT1	Chr22_22690592	GSTT1	LC20386	Chr22_22690592	(0.11,1.23,2.17)	1	1	10	17.2	62	40	20	33.9	27	46.6	75	48.4	30	50.8	21	36.2	18	11.6	9	15.3	-	-	-	-	-	-	0.000277741	0.0167086	5.30554e-05	0.61954	GI_4504184-S	NM_000853
[truncated: 2 more columns]
