# Supplementary material for: Identification of Copy Number Variants Defining Genomic Differences among Major Human Groups
Source: PLoS One. 2009 Sep 30;4(9):e7230. doi: 10.1371/journal.pone.0007230 (PMC2747275; doi:10.1371/journal.pone.0007230)
Supplement: Table S3 — Comparison of CNVs identified in this study and previsouly existing information on the Database of Genomic Variants (DGV). The agreement column states whether our findings agree with previously published results (Agree), do not agree (Disagree), or could not be verified (Unverifiable) either because the CNV herein identified was not previously reported or there were inconsistencies in the description of the CNV in the original paper or in the Database of Genomic Variants. (0.04 MB XLS) [file pone.0007230.s003.xls]

## Sheet: Hoja1
Table S3. Comparison of CNVs identified in this study and previsouly existing information on the Database of Genomic Variants (DGV)
THIS STUDY								PREVIOUS STUDIES
CNVID	chrom	chromStart	chromEnd	Pop	Type	GENE MLPA Probe	Agreement										Previous information	Reported in paper	Samples Studied	Comments
								GAIN				LOSS				G & L
								YRI	CEU	ASN	Total	YRI	CEU	ASN	Total	Total
3a	chr1	72389150	72578706	ND	Complex	NEGR1	Unverifiable	-	-	-	0	-	-	-	3	3	Losses 3	Wong et al. 2007, AJHG	95 individuals from Multiple Origins	Different populations under study
3b	chr1	72389150	72578706	ND	Complex	None	Unverifiable	-	-	-	0	-	-	-	3	3	Losses 3	Wong et al. 2007, AJHG	95 individuals from Multiple Origins	Different populations under study
5a	chr1	194977713	195129718	ND	Complex	CFHR3	Disagree	3	7	5	15	6	1	3	10	25	Gains 15; 3 YRI; 7 CEU; 5 ASN|Loss 10; 6 YRI; 1 CEU; 3 ASN	Perry et al, 2008	30 HapMap	Slight Agreement in frequencies but not complete
5b	chr1	194977713	195129718	ND	Complex	CFHR1	Disagree	3	7	5	15	6	1	3	10	25	Gains 7 CEU; 5 ASN; 3 YRI| Loss 1 CEU; 3 ASN; 6 YRI	Perry et al, 2008	30 HapMap	Disagree
6	chr1	195436118	195436176	JPT	gain	ZBTB41	Disagree	-	-	-	0	-	-	-	0	1	Gains/Losses 1	Redon et al, 2006	270 HapMap	Disagree
11	chr2	219251485	219251544	YRI	loss	STK36	Unverifiable	-	-	-	0	-	-	-	4	4	Losses 4	de Smith et al, 2007	50 french individuals	Not measurable
15	chr3	46771035	46824521	YRI	loss	None	Unverifiable	-	-	-	0	-	-	-	0	30	Gains/Losses 30	Redon et al, 2006	270 HapMap	No individual information on DGV
20	chr3	164046691	164101835	JPT	loss	None	Agree	9	9	5	23	0	0	3	3	26	Gains 23; 9 YRI; 9 CEU; 5 ASN| 3 Losses; 3 ASN	Perry et al, 2008	30 HapMap	Agreement
24	chr4	41441170	41441229	YRI	loss	PHOX2B	Unverifiable	-	-	-	12	-	-	-	0	12	Gains 12	de Smith et al, 2007	50 french individuals	Not measurable
25	chr4	68980297	69150305	JPT	loss	UGT2B17	Agree	10	10	1	21	-	-	-	0	21	Gains 21; 10 CEU; 10 YRI; 1 CHB	Perry et al, 2008	30 HapMap	Agreement
31	chr5	70405656	70424600	YRI	gain	AK130833	Unverifiable	-	-	-	10	-	-	-	10	20	10 losses; 10 gains; 75 G/L	Wang et al, 2007; Redon et al, 2006	HapMap; 95 controls; HapMap	Not measurable
35	chr5	150191404	150202900	CEU	gain	None	Agree	-	-	-	0	9	-	7	16	16	16 losses; 9 YRI; 7 ASN	Perry et al, 2008	30 HapMap	Agreement
37	chr6	160912556	160985921	JPT	gain	LPA	Agree	11	6	5	22	-	-	-	0	22	22 gain; 11 YRI; 6 CEU; 5 ASN	Perry et al, 2008	30 HapMap	Agreement
38	chr6	32594054	32633740	ND	Complex	HLA-DRB5	Unverifiable	-	-	-	30	-	-	-	22	52	22 loss; |30 gain;	Perry et al, 2008	30 HapMap	Unconsistent results in Perry et al.
46	chr7	142158954	142171665	ND	Complex	None	Agree	-	-	-	0	2	7	8	17	17	17 loss; 2 YRI; 7 CEU; 8 ASN	Perry et al, 2008	30 HapMap	Agreement
48	chr8	39356595	39499811	CEU	loss	None	Agree	7	1	7	15	-	-	-	0	15	15 gains; 7 YRI; 1 CEU; 7 ASN	Perry et al, 2008	30 HapMap	Agreement
53	chr9	36353448	36353507	CEU	loss	RNF38	Unverifiable	-	-	-	0	-	-	-	17	17	17 loss	de Smith et al, 2007	50 french individuals	Not measurable
54	chr9	104230595	104390758	ND	Complex	None	Unverifiable	NA	NA	NA	NA	NA	NA	NA	NA	NA		Not Previously identified
64a	chr12	11109562	11113235	JPT	gain	PRR4	Agree	10	8	3	21	-	-	-	0	21	21 losses; 10 YRI; 8 CEU; 3 ASN	Perry et al, 2008	30 HapMap	Compatible; shown as a single large CNV
64b	chr12	11109562	11113235	JPT	gain	PRR4	Agree	10	8	3	21	-	-	-	0	21	21 losses; 10 YRI; 8 CEU; 3 ASN	Perry et al, 2008	30 HapMap	Compatible; shown as a single large CNV
71	chr13	56562261	56689097	YRI	gain	FLJ40296	Agree	8	3	2	13	-	3	2	5	18	12 gains; 8 YRI; 3 CEU; 2 ASN|5 losCEU; 2 ASN	Perry et al, 2008	30 HapMap	Agreement
76	chr14	105467525	106005747	YRI	gain	None	Unverifiable	NA	NA	NA	NA	NA	NA	NA	NA	NA		de Smith et al, 2007		Not comparable because lack of information about population origin
78a	chr16	14956177	14988913	JPT	loss	KIAA0251	Agree	-	-	-	0	3	0	8	11	11	11 losses; 3 YRI; 0 CEU; 8 ASN	Perry et al, 2008	30 HapMap	Agreement
81	chr16	54359983	54376864	YRI	gain	None	Agree	-	-	-	0	1	5	7	13	13	13 losses; 1 YRI; 5 CEU; 7 ASN	Perry et al, 2008	30 HapMap	Agreement
83	chr16	70653608	70669840	YRI	gain	HPR	Agree	6	1	0	7	0	0	1	1	8	7 gains; 6 YRI; 1 CEU; 0 ASN|1 loss; 0 YRI; 0 CEU; 1 ASN	Perry et al, 2008	30 HapMap	Agreement
87	chr17	33267468	33427467	CEU	loss	None	Agree	10	0	8	18	5	5	8	18	36	18 gains; 10 YRI; 0 CEU; 8 ASN|18 loss; 5 YRI; 5 CEU; 8 ASN	Perry et al, 2008	30 HapMap	Agreement + Inconsistencies: same sample with opposite CNs
88	chr17	33535461	33705009	CEU	loss	TBC1D3	Agree	10	0	8	18	5	5	8	18	36	18 gains; 10 YRI; 0 CEU; 8 ASN|18 loss; 5 YRI; 5 CEU; 8 ASN	Perry et al, 2008	30 HapMap	Agreement + Inconsistencies: same sample with opposite CNs
89	chr17	41519537	41734024	CEU	gain	KIAA1267	Agree	5	12	8	25	-	-	-	0	25	25 gains; 5 YRI; 12 CEU; 8 ASN	Perry et al, 2008	30 HapMap	Relative agreement because lots of ASN are reported with gains; extremely large CNV reported in literature
91	chr17	42866562	43120185	YRI	gain	NPEPPS	Agree	10	0	4	14	1	3	8	12	26	14 gains; 10 YRI; 0 CEU; 4 ASN| 12 losses; 1 YRI; 3 CEU; 8 ASN	Perry et al, 2008	30 HapMap	Agreement
98	chr19	11298922	11298976	CEU	gain	RAB3D	Unverifiable	-	-	-	0	-	-	-	0	0		Not Previously identified		Not measurable
103	chr20	30111396	30111455	JPT	gain	HCK	Unverifiable	-	-	-	0	-	-	-	0	1	1 gain/loss in 112 individuals	Wang et al, 2007	112 HapMap	Not measurable
110	chr22	37689058	37715431	ND	Complex	APOBEC3B	Disagree	-	-	-	0	0	2	3	5	5	5 losses; 0 YRI; 2 CEU; 3 ASN	Perry et al, 2008	30 HapMap	Disagree
111	chr22	22696038	22725353	ND	Complex	GSTT1	Unverifiable	NA	NA	NA	24	NA	NA	NA	21	45	24 gains|21 Losses	Perry et al, 2008	30 HapMap	Unconsistent results in Perry et al.
