# Supplementary material for: Identification of Copy Number Variants Defining Genomic Differences among Major Human Groups
Source: PLoS One. 2009 Sep 30;4(9):e7230. doi: 10.1371/journal.pone.0007230 (PMC2747275; doi:10.1371/journal.pone.0007230)
Supplement: Table S4 — Gene Ontology Analysis (part I). Gene ontology analysis of genes located within the identified CNVs reveals enrichment in different functional categories when compared to the rest of human genes. (0.02 MB XLS) [file pone.0007230.s004.xls]

## Sheet: GOTMvsWholeGeneSet
Table S4. Gene Ontology Analysis (I)
	Observed	Expected	Enrichment Ratio	P-value
In biological process
proteolysis	6	1	6	0.00032552
activation of plasma proteins during acute inflammatory response	2	0.06	33.33	0.00149577
complement activation	2	0.06	33.33	0.00149577
protein metabolism	10	4.76	2.1	0.0096526
immune system process	5	1.05	4.76	0.0031204
activation of immune response	2	0.07	28.57	0.0023302
immune effector process	2	0.1	20	0.00424155
immune response	4	0.84	4.76	0.00878991
humoral immune response	3	0.23	13.04	0.00155722
regulation of immune response	2	0.09	22.22	0.00358653
positive regulation of immune response	2	0.08	25	0.00310008
regulation of immune system process	2	0.09	22.22	0.00358653
positive regulation of immune system process	2	0.08	25	0.00310008
acute inflammatory response	2	0.1	20	0.00465916
positive regulation of organismal physiological process	2	0.09	22.22	0.00371339
In molecular function
serine-type endopeptidase activity	3	0.25	12	0.00183615
serine-type peptidase activity	3	0.28	10.71	0.00250813
lipid transporter activity	2	0.12	16.67	0.0059181
In cellular component
extracellular region	7	1.87	3.74	0.00166777
extracellular region part	5	1.17	4.27	0.00513834
extracellular space	5	0.77	6.49	0.000795981
