# Supplementary material for: Identification of Copy Number Variants Defining Genomic Differences among Major Human Groups
Source: PLoS One. 2009 Sep 30;4(9):e7230. doi: 10.1371/journal.pone.0007230 (PMC2747275; doi:10.1371/journal.pone.0007230)
Supplement: Table S5 — Gene Ontology Analysis (part II). Gene ontology analysis of genes located within the identified CNVs reveals enrichment in different functional categories when compared to genes located within known CNVs. (0.01 MB XLS) [file pone.0007230.s005.xls]

## Sheet: vsGenesInCNVs
Table S5. Gene Ontology Analysis (II)
	Observed	Expected	Enrichment Ratio	P-value
In biological process
proteolysis	6	1.05	5.71	0.000410738
activation of plasma proteins during acute inflammatory response	2	0.08	25	0.00265049
complement activation	2	0.08	25	0.00265049
protein metabolism	10	4.44	2.25	0.0056729
immune system process	5	1.02	4.9	0.00278188
activation of immune response	2	0.09	22.22	0.00360947
immune effector process	2	0.12	16.67	0.00637946
immune response	4	0.8	5	0.00732817
humoral immune response	3	0.26	11.54	0.00207066
regulation of immune response	2	0.1	20	0.004326
positive regulation of immune response	2	0.1	20	0.0039601
regulation of immune system process	2	0.1	20	0.004326
positive regulation of immune system process	2	0.1	20	0.0039601
acute inflammatory response	2	0.12	16.67	0.00637946
positive regulation of organismal physiological process	2	0.1	20	0.0039601
In molecular function
serine-type endopeptidase activity	3	0.28	10.71	0.00262724
serine-type peptidase activity	3	0.33	9.09	0.00391285
lipid transporter activity	2	0.11	18.18	0.0055068
In cellular component
extracellular region	7	2.01	3.48	0.00245627
extracellular region part	5	1.21	4.13	0.00583102
extracellular space	5	0.74	6.76	0.000672122
