# Supplementary material for: Identification of Copy Number Variants Defining Genomic Differences among Major Human Groups
Source: PLoS One. 2009 Sep 30;4(9):e7230. doi: 10.1371/journal.pone.0007230 (PMC2747275; doi:10.1371/journal.pone.0007230)
Supplement: Table S6 — Comparison of Ka/Ks ratios of genes located within population-specific CNV changes. For the Ensembl dataset, mean and median values are calculated from dN/dS. For the calculations on the Khaitovich dataset, we used the Ka/Ki measure. P-values were calculated as the number of times that the observed mean value exceeded or equaled the value in the permutation analysis out of 10,000 permutations. (0.02 MB XLS) [file pone.0007230.s006.xls]

## Sheet: Hoja1
Table S6. Comparison of Ka/Ks ratios of genes located within population-specific CNV changes
	Observed				Permuted values					P-value
	n	Mean	Median		Mean	Median	Min	Max
Ensembl dataSet	27	0.61	0.49		0.45	0.44	0.14	1.09		0.1
Khaitovich et al dataset	16	0.31	0.12		0.25	0.24	0.04	0.68		0.2
