# Supplementary material for: Identification of Copy Number Variants Defining Genomic Differences among Major Human Groups
Source: PLoS One. 2009 Sep 30;4(9):e7230. doi: 10.1371/journal.pone.0007230 (PMC2747275; doi:10.1371/journal.pone.0007230)
Supplement: Table S7 — Indexes of molecular evolution. All evolutionary measures were published or available elsewhere as described in the Methods section. Values were calculated by comparing human versus chimpanzee sequences. Ka is the number of non-synonymous nucleotide substitutions per non-synonymous site. Ks is the number of synonymous nucleotide substitutions per synonymous site. Ki is the number of substitutions per site in interspersed repeats in a 250-kbp window around the center of each gene (see Khaitovich et. al, 2005). dn/ds: number of non-synonymous substitutions per non-synonymous site divided by the number synonymous substitutions per silent site. (0.02 MB XLS) [file pone.0007230.s007.xls]

## Sheet: supplementaryTable5.txt
Table S7. Indexes of molecular evolution
		Khaitovich et al.					Ensembl
geneID	ensemblID	Ks	Ka	Ki	Ka/Ki	Ka/Ks	dn_ds
APOBEC3A	ENSG00000128383	0.0286	0.0091	0.01504	0.605053	0.318182	-
APOBEC3B	ENSG00000179750	0.0156	0.0271	0.01503	1.80306	1.73718	1.73718
ARL17	ENSG00000136447	-	-	-	-	-	-
BATF	ENSG00000156127	0.0106	0	0.01149	0	0	0
C17ORF57	ENSG00000178852	-	-	-	-	-	4
CES4	ENSG00000198848	-	-	-	-	-	-
CFH	ENSG00000000971	-	-	-	-	-	0.566038
CFHR1	ENSG00000080910	-	-	-	-	-	1.0625
CFHR3	ENSG00000116785	-	-	-	-	-	-
CFHR4	ENSG00000134365	-	-	-	-	-	-
FLJ40296	ENSG00000204914	-	-	-	-	-	-
GSTT1	ENSG00000184674	0.0049	0	0.01222	0	0	0
HCK	ENSG00000101336	0.0112	0.001	0.00925	0.108108	0.0892857	0.12973
HLA-DRB5	ENSG00000198502	-	-	-	-	-	-
HPR	ENSG00000205103	-	-	-	-	-	0.989726
KIAA0251	ENSG00000179889	-	-	-	-	-	0.493671
KIAA1267	ENSG00000120071	-	-	-	-	-	0.353846
KPNB1	ENSG00000108424	0.0133	0	0.01256	0	0	0
LPA	ENSG00000198670	-	-	-	-	-	-
LRRC37A	ENSG00000176681	-	-	-	-	-	0.969388
NAIP	ENSG00000081770	-	-	-	-	-	0.642202
NDST3	ENSG00000164100	0.0017	0.0005	0.01203	0.0415628	0.294118	0.294118
NEGR1	ENSG00000172260	0.0086	0	0.01196	0	0	0
NPEPPS	ENSG00000141279	0.0038	0.0023	0.01129	0.20372	0.605263	0
OCLN	ENSG00000197822	0.0146	0.0018	0.01295	0.138996	0.123288	0
PHOX2B	ENSG00000109132	0.0253	0	0.0108	0	0	0
PRR4	ENSG00000111215	-	-	-	-	-	0.630769
PRSS2	ENSG00000204982	0.0054	0.0157	0.01385	1.13357	2.90741	0.545455
RAB3D	ENSG00000105514	0.0421	0.0019	0.01432	0.132682	0.0451306	-
RNF38	ENSG00000137075	0.0045	0.0012	0.01308	0.0917431	0.266667	0.263158
STK36	ENSG00000163482	-	-	-	-	-	0.46875
TBC1D3	ENSG00000174115	-	-	-	-	-	0.527881
TCRVB	ENSG00000211708	-	-	-	-	-	-
TMDC	ENSG00000168619	-	-	-	-	-	0.614286
TMDCII	-	-	-	-	-	-	-
TRY6	ENSG00000204983	-	-	-	-	-	-
TSP50	ENSG00000206549	0.0042	0.0034	0.01084	0.313653	0.809524	1.07143
UGT2B15	ENSG00000196620	0.009	0.0072	0.01837	0.391943	0.8	0.851064
ZBTB41	ENSG00000177888	-	-	-	-	-	0.324074
Median					0.120395	0.194977	0.493671
Average					0.310256	0.499753	0.612417
