# Supplementary material for: Identification of Copy Number Variants Defining Genomic Differences among Major Human Groups
Source: PLoS One. 2009 Sep 30;4(9):e7230. doi: 10.1371/journal.pone.0007230 (PMC2747275; doi:10.1371/journal.pone.0007230)
Supplement: Table S8 — Linkage disequilibrium for SNPs and CNVs. In the table it is reflected the calculated r-squared value (r2) and the SNP showing the maximum LD with the copy number state revealed by the MLPA probes in the first column. Values were obtained for each population independently and considering all populations together. The column SNPs indicates the number of HapMap SNPs retrieved for each analysed region flanking the CNV. For three of the probes it was not possible to measure LD because more than three copy number states were present (**) or because no SNP data was available for individuals showing the CNV (***). (0.03 MB XLS) [file pone.0007230.s008.xls]

## Sheet: SNPsMaxLD.tbl
Table S8. Linkage disequilibrium for SNPs and CNVs
		CEU				CHB+JPT				YRI				All populations
MLPA probe Name		SNP name	max LD	SNPs		SNP name	max LD	SNPs		SNP name	max LD	SNPs		SNP name	max LD	SNPs		Comments
A_14_P105195		NA	NA	108		NA	NA	97		NA	NA	126		NA	NA	80		***
A_14_P105959		rs4326657	0.860113	133		rs1582118	0.525575	111		NA	NA	167		rs17617042	0.125533	80
A_14_P112851		rs317913	0.648461	115		rs4804592	0.802364	108		NA	NA	137		rs445733	0.570917	100
A_14_P114658		rs12989189	0.244212	121		rs12993599	0.442861	120		NA	NA	148		rs13011342	0.490556	110
A_14_P133280		rs10814378	0.999483	103		rs10814380	0.999575	109		rs10814378	0.999584	138		rs10814382	0.998468	91
A_14_P136499		rs17143112	0.270829	286		rs7781887	0.504127	241		NA	NA	303		rs17816709	0.563594	196
A_14_P201208		rs13128110	0.390589	220		rs10002429	0.467528	171		rs2304650	0.46152	249		rs17590698	0.53491	142
Chr10_Pop_1		rs12218691	0.931703	102		rs2574892	0.901525	71		rs11188962	0.641093	111		rs12770491	0.312517	61
Chr13_Pop_1		rs790327	0.33583	144		rs515294	0.430851	131		rs3850082	0.184503	137		rs11148400	0.354682	99
Chr13_Pop_2		rs9316915	0.252963	129		rs11841545	0.276934	117		rs566105	0.668198	106		rs959745	0.312806	87
Chr14_Pop_1		rs12880505	0.0282243	11		rs12588246	0.325348	26		rs2256589	0.0361819	36		rs12588246	0.0863395	5
Chr14_Pop_2		rs11848474	0.548327	71		rs17646414	0.690085	104		rs7145943	0.241403	89		rs11847758	0.523494	35
Chr15_Pop_1		NA	NA	60		rs4372653	0.572828	52		rs1845994	0.747712	69		rs1845994	0.754295	40
Chr16_70653608		rs17666271	0.726352	200		rs3812985	0.681123	176		rs7184117	0.695035	201		rs8057016	0.712697	155
Chr16_Pop_1		rs11863214	0.455614	33		rs4985167	0.180607	30		rs1741	0.0975178	30		rs11863214	0.365085	26
Chr16_Pop_2		NA	NA	28		rs2280018	0.208493	26		NA	NA	27		rs11863419	0.335363	23
Chr1B_Pop_2		rs16840639	0.906017	111		rs16840639	0.893699	92		rs12144939	0.671048	123		rs16840639	0.794117	61
Chr1_193470134		NA	NA	123		NA	NA	117		NA	NA	148		NA	NA	82		**
Chr22_22690592		rs1006771	0.192239	63		rs5760147	0.322797	67		rs6004041	0.382889	60		rs738809	0.341179	46
Chr22_Pop_1		rs2076109	0.49511	139		rs17000581	0.739465	136		rs729809	0.468763	157		rs5757451	0.320459	93
Chr22_Pop_2		rs2076109	0.49511	137		rs17000581	0.739465	140		rs5757372	0.492359	147		rs5750726	0.335974	97
Chr3_164046699		NA	NA	153		NA	NA	126		NA	NA	146		NA	NA	109		**
Chr3_46771035		rs6442027	0.15565	113		NA	NA	90		rs7426919	0.526928	110		rs1077216	0.41091	79
Chr4_69231671		rs12511559	0.154534	15		rs7442348	0.554839	13		rs12511559	0.155254	33		rs4260611	0.136688	9
Chr6_32594054		rs7451962	0.438577	250		rs7747521	0.410524	303		rs2097432	0.302092	245		rs2516049	0.316876	214
Chr8_39356595		rs12549233	0.151181	107		rs7015330	0.245289	168		rs4346962	0.394573	109		rs10958546	0.214696	74
Chr9_Pop_1		NA	NA	306		rs7868071	0.906455	316		rs9969776	0.622125	305		rs7048350	0.87956	295
chr12_111_A		rs2900554	0.930704	123		rs7135018	0.999098	120		rs1376250	0.999459	135		rs1376250	0.957782	104
chr12_111_B		rs10772408	0.189449	130		rs7294858	0.357021	127		rs10732561	0.327173	142		rs10772408	0.414913	111
chr16_543_A		rs1814269	0.295194	232		rs258097	0.196298	223		rs4784557	0.446789	264		rs11862589	0.256973	203
chr16_543_B		rs5568	0.19801	234		rs36010	0.192421	223		rs4784557	0.488925	267		rs11862589	0.223271	204
chr17_415_A		rs8064802	0.411574	342		rs17576870	0.699091	46		rs1547936	0.473695	100		rs8064802	0.65161	27
chr17_415_B		rs2240757	0.26226	159		rs2240757	0.183492	13		rs2696558	0.249162	22		rs7206949	0.171409	8
chr17_429_A2		rs9901869	0.108592	39		rs3760371	0.178506	33		rs8072100	0.498102	36		rs4497739	0.169878	27
chr19_8743145_8784792_B		rs329939	0.206355	210		rs8182486	0.36438	187		rs16984006	0.756029	232		rs2562024	0.423072	164
chr5_130_B_LYRM7		rs12513768	0.0804899	109		rs12513768	0.309138	71		rs7721068	0.589642	119		rs9327603	0.20867	64
chr5_150_A		rs2004711	0.930481	164		rs10053750	0.819156	147		rs13361189	0.965347	184		rs7709721	0.877539	136
chr5_150_B		rs9324656	0.632377	164		rs11958146	0.907289	150		rs13361189	0.999352	187		rs7732643	0.843326	137
chr7_143_A		rs1635884	0.215748	34		rs1731354	0.506413	37		rs7791258	0.187627	36		rs7804359	0.299176	34
chr8_108_B		rs10505110	0.356883	204		rs1368493	0.495302	214		rs9297398	0.424188	228		rs10505110	0.416915	177
